# Supplementary material for: Quantum Cutting in Ultraviolet B-Excited KY(CO3)2:Tb3+ Phosphors
Source: MDPI journal article supplement (doi:10.3390/ma15176160), 2022-09-05
Supplement: s1 [file s1]

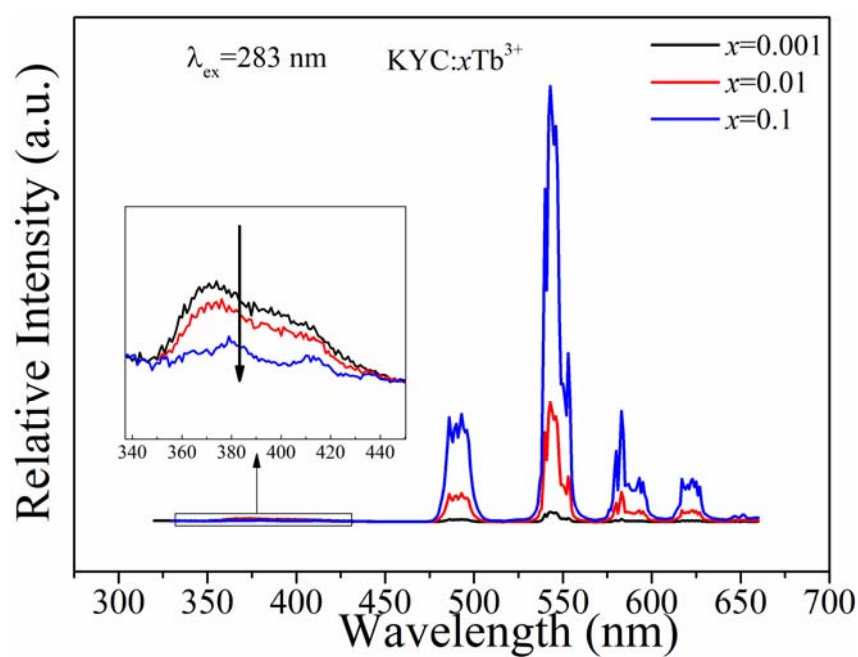

Figure S1. Emission spectra of KYC: $x\text{Tb}^{3+}$  ( $x=0.001, 0.01, 0.1$ ) excited at 283 nm.

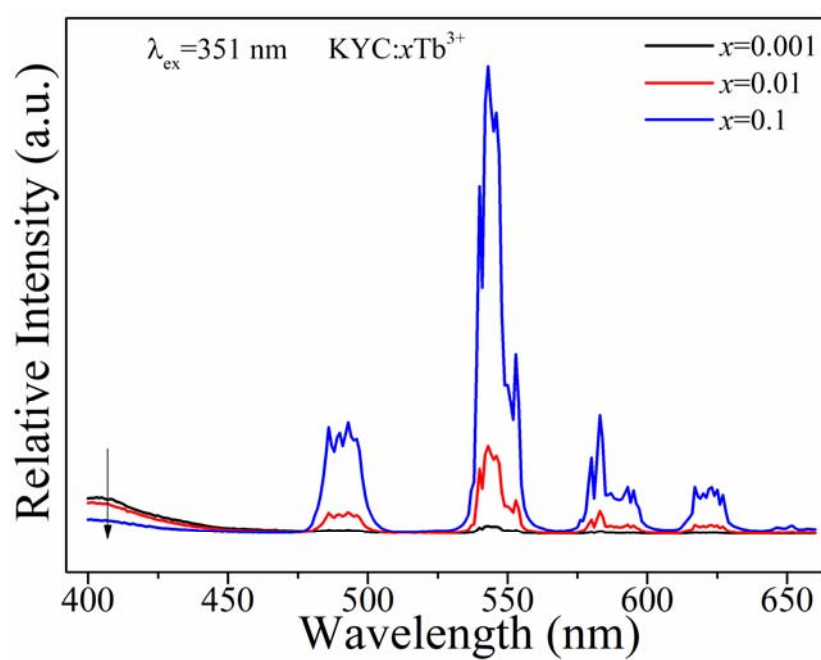

Figure S2. Emission spectra of KYC: $x\text{Tb}^{3+}$  ( $x=0.001, 0.01, 0.1$ ) excited at 351 nm.
